# Supplementary material for: CcMYB12 Positively Regulates Flavonoid Accumulation during Fruit Development in Carya cathayensis and Has a Role in Abiotic Stress Responses
Source: MDPI journal article supplement (doi:10.3390/ijms232415618), 2022-12-09
Supplement: s1 [file s1]

Table S2

| Genes                                       | Forward Primer (5' –3')                                | Reverse Primer (5' –3')                           |
|---------------------------------------------|--------------------------------------------------------|---------------------------------------------------|
| <b>Subcellular Localization Assay</b>       |                                                        |                                                   |
| <i>CcMYB12</i>                              | gagctcggtacccggggatccATGGGAAGGGCACCATGTTG              | catgtcgactctagaggatccTTTTCTTCAGTACTACCTTTGTTGCT   |
| <b>Dual-luciferase reporter (DLR) assay</b> |                                                        |                                                   |
| <i>CcMYB12</i>                              | cgctctagaactagtggatccATGGGAAGGGCACCATGTTG              | ttctgcagcccgggggatccCTATTTTTCTTCAGTACTACCTTTGTTGC |
| <i>CcC4H</i>                                | ttctgcagcccgggggatccGTTCTAAATAGAGAAACTTCAAGTAGGCTT     | cgctctagaactagtggatccTTTCGTGATGAAGAAAGAAGGGA      |
| <i>CcCHS</i>                                | ttctgcagcccgggggatccAAAAATCAGGTAGAGCATTGGATTG          | cgctctagaactagtggatccGCCTCTTGCTCGACCCTAGTT        |
| <i>CcCHI</i>                                | ttctgcagcccgggggatccATGCACTTTTCAGGGGGAGTAA             | cgctctagaactagtggatccTTTGACGCGTATATTAGTGGTAACTATG |
| <i>CcF3H</i>                                | ttctgcagcccgggggatccATATATCAAATCACGTCAATTTGTGAGA       | cgctctagaactagtggatccTTTGCAGGAACCTGAATTGAGTTGC    |
| <i>CcF3'H</i>                               | ttctgcagcccgggggatccTTGATTTGTCGTGTTTTGAATTTTT          | cgctctagaactagtggatccGGCGAGCTTTTTTGTCTGTGC        |
| <i>CcF3'5'H</i>                             | ttctgcagcccgggggatccACTTCCATTTTTTCAGATTTTACTTGAA       | cgctctagaactagtggatccGGTGTTGCAGGCTCTTGCA          |
| <i>CcANS</i>                                | ttctgcagcccgggggatccAAAGATAAATACATTATGGTGTAACCTTATATCG | cgctctagaactagtggatccTGTAAGAAAAGCAGCACGCTTT       |
| <i>CcANR</i>                                | ttctgcagcccgggggatccAGGACCTTTTTAAAGATTACTACTCATATTT    | cgctctagaactagtggatccGGAGTTTCGATATTCAGTGCTACCTT   |
| <i>CcDFR</i>                                | ttctgcagcccgggggatccTTTTTTTTCTTTCATATATAAAAGCGAA       | cgctctagaactagtggatccGCTCCTTTTTCTTAATAAAAAGAAAACA |
| <b>Transactivation Analysis</b>             |                                                        |                                                   |
| <i>CcMYB12</i>                              | atggccatggaggccgaattcATGGGAAGGGCACCATGTTG              | tcgacggatccccggaattcCTATTTTTCTTCAGTACTACCTTTGTTGC |
| <b>Arabidopsis Transformation</b>           |                                                        |                                                   |
| <i>CcMYB12</i>                              | gagctcggtacccggggatccATGGGAAGGGCACCATGTTG              | catgtcgactctagaggatccTTTTCTTCAGTACTACCTTTGTTGCT   |
| <b>qRT-PCR</b>                              |                                                        |                                                   |
| <i>CcMYB12</i>                              | CGGGGAGTGTTACGATTGCT                                   | TCCCATAAGGCCCATTTGGTT                             |
| <i>CcACTIN</i>                              | GCGACAATGGAAC TGGA                                     | CCTCTTTGACTGGGCTTC                                |
| <i>CcPAL</i>                                | GGCCAGGAAAGACCAGAAG                                    | GACAAGACCATGACGATGAT                              |
| <i>CcCHS</i>                                | GTTGGGCTTACATTCCATCTC                                  | GCTTCAGAGCCAACTTTTC                               |
| <i>CcCHI</i>                                | AAAGATGAGTCCATTCCCG                                    | TGATTTTCGGCTTCTGTATC                              |
| <i>CcF3H</i>                                | ACCATCACTCTGTTGTTGC                                    | CTTGAACCTCCCGTTACTC                               |
| <i>CcF3'H</i>                               | TCAAATCAATGGTG GTGAG                                   | AACGATGGCTGTCAAAAAC                               |
| <i>CcF3'5'H</i>                             | TCAAGCATAATAGAGTGGGC                                   | AGGTTTAGTGGGGTAGACG                               |
| <i>CcFLS</i>                                | GCTCTCATTATTCACATCGG                                   | GGAGGGTTCTCTTCACTAAC                              |
| <i>CcFNS</i>                                | GAGGTGGCGGACAAGCTATT                                   | CAAGTGCTAGATCAGGGCGA                              |
| <i>AtPAL</i>                                | ATCGAAGTGATCCGTTACGC                                   | ACTCCGATTGGTGTTCC TTG                             |
| <i>AtC4H</i>                                | TCGACACAGTTCTTG GACCG                                  | TGGAGGTTCATGTGAGGCAC                              |
| <i>At4CL</i>                                | CGCAAACCTTTTCTTCACTC                                   | ACTCCGTCGTCGTTTTGAAG                              |
| <i>AtCHS</i>                                | TGAGAACCATGTGCTTCAGG                                   | CAGATGCATGTGACGTTTCC                              |
| <i>AtF3H</i>                                | TCAGATCGTTGAGGCTTG TG                                  | ATGTCAAACGGAGCTTGTC                               |
| <i>AtF3'H</i>                               | CCTCCACCTCCGACTAGGGT                                   | TGCTCGGCCACGGATTTA                                |
| <i>AtANS</i>                                | TCAAGAAAGCCGGAGAAGAG                                   | TTGTCCACTCGCGTTGTTAG                              |
| <i>AtDFR</i>                                | GTCGGTCCATT CATCACAAC                                  | TGAGCGTTGCATAAGTCGTC                              |
| <i>AtACTIN</i>                              | TGCTGGATTCTGGTGATGGT                                   | ATTCCCCGCTCTGCTGTG                                |
