# Supplementary material for: CcMYB12 Positively Regulates Flavonoid Accumulation during Fruit Development in Carya cathayensis and Has a Role in Abiotic Stress Responses
Source: MDPI journal article supplement (doi:10.3390/ijms232415618), 2022-12-09
Supplement: s1 [file s1]

Table S1

|     |              |              |              |              |              |              |              |              |
|-----|--------------|--------------|--------------|--------------|--------------|--------------|--------------|--------------|
| S1  | CCA0705S0001 | CCA0634S0058 | CCA1196S0013 | CCA0779S0067 | CCA0816S0015 |              |              |              |
| S2  | CCA1289S0001 | CCA0757S0066 | CCA0912S0003 | CCA0510S0131 |              |              |              |              |
| S3  | CCA0563S0066 |              |              |              |              |              |              |              |
| S4  | CCA0638S0185 | CCA0748S0009 | CCA0522S0037 | CCA0816S0089 | CCA0779S0016 |              |              |              |
| S5  | CCA1382S0024 |              |              |              |              |              |              |              |
| S6  | CCA0887S0030 | CCA0887S0029 |              |              |              |              |              |              |
| S7  | CCA0526S0313 | CCA0691S0036 | CCA1161S0009 | CCA1381S0001 | CCA0857S0055 | CCA1410S0053 | CCA1236S0030 | CCA1161S0008 |
| S9  | CCA0779S0047 | CCA0816S0043 | CCA1309S0008 | CCA1309S0003 | CCA0912S0044 | CCA0912S0054 | CCA0500S0004 |              |
| S10 | CCA0954S0020 | CCA1724S0002 | CCA1046S0036 | CCA1055S0070 |              |              |              |              |
| S11 | CCA0961S0018 | CCA0576S0060 | CCA0568S0059 | CCA0628S0078 | CCA1603S0008 |              |              |              |
| S12 | CCA0632S0174 | CCA0789S0045 | CCA0800S0132 | CCA1126S0077 |              |              |              |              |
| S13 | CCA0791S0008 | CCA1111S0034 | CCA0633S0098 |              |              |              |              |              |
| S14 | CCA0779S0112 | CCA0516S0022 | CCA1073S0035 | CCA1057S0050 | CCA0704S0070 | CCA1606S0014 | CCA0834S0049 | CCA0578S0020 |
|     | CCA0007S0005 | CCA0879S0071 | CCA0533S0220 | CCA1097S0043 | CCA1430S0009 | CCA0680S0023 |              |              |
| S15 | CCA1168S0035 | CCA1132S0027 | CCA1788S0002 | CCA0633S0045 |              |              |              |              |
| S16 | CCA0800S0131 |              |              |              |              |              |              |              |
| S18 | CCA0616S0013 | CCA0082S0007 | CCA0799S0040 | CCA1013S0028 | CCA0552S0187 | CCA0826S0075 |              |              |
| S19 | CCA1094S0019 |              |              |              |              |              |              |              |
| S20 | CCA0526S0256 | CCA1057S0032 | CCA0737S0065 | CCA0762S0050 | CCA1045S0020 | CCA0922S0013 | CCA0984S0066 |              |
| S21 | CCA0605S0052 | CCA1147S0056 | CCA0573S0003 | CCA1126S0086 | CCA0883S0023 | CCA0819S0012 | CCA0884S0122 |              |
| S22 | CCA0774S0069 | CCA0525S0079 | CCA0929S0034 | CCA0670S0116 | CCA1550S0010 | CCA0912S0106 |              |              |
| S23 | CCA0784S0147 | CCA0784S0053 |              |              |              |              |              |              |
| S24 | CCA0001S0007 | CCA1217S0050 | CCA0514S0238 | CCA0656S0018 |              |              |              |              |
| S25 | CCA1244S0016 | CCA1157S0021 | CCA0524S0280 | CCA0582S0107 | CCA0779S0170 | CCA1094S0010 |              |              |
